# Supplementary material for: Postharvest Storage Differentially Modulates the Enzymatic and Non-Enzymatic Antioxidant System of the Exocarp and Mesocarp of Hass Avocado: Implications for Disorders
Source: MDPI journal article supplement (doi:10.3390/plants12234008), 2023-11-29
Supplement: s1 [file s1]

Supplementary Figures

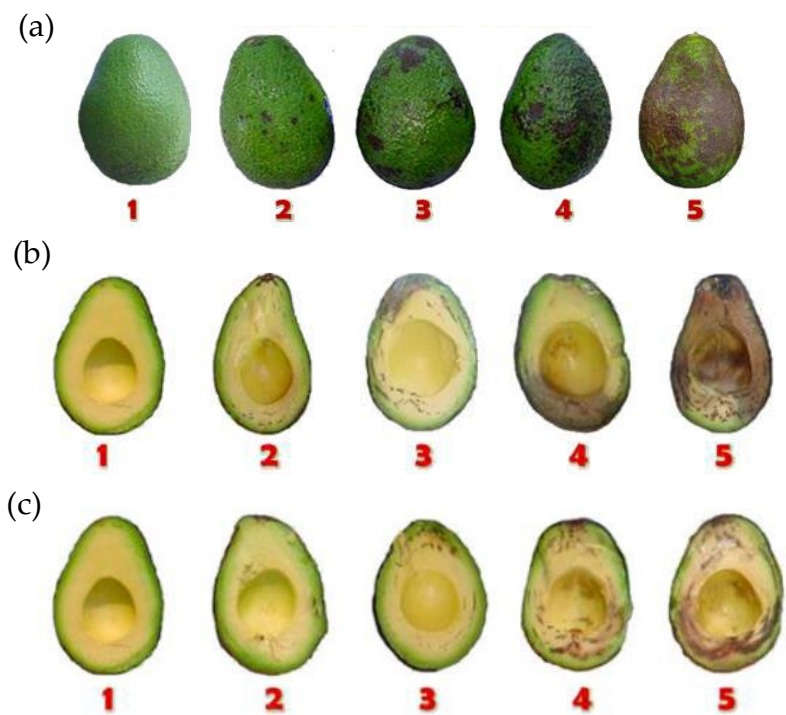

**Figure S1.** Qualitative-quantitative scale to qualify the appearance of dark spots at exocarp level (a) and pulp browning (b) and vascular browning (c) at mesocarp level.

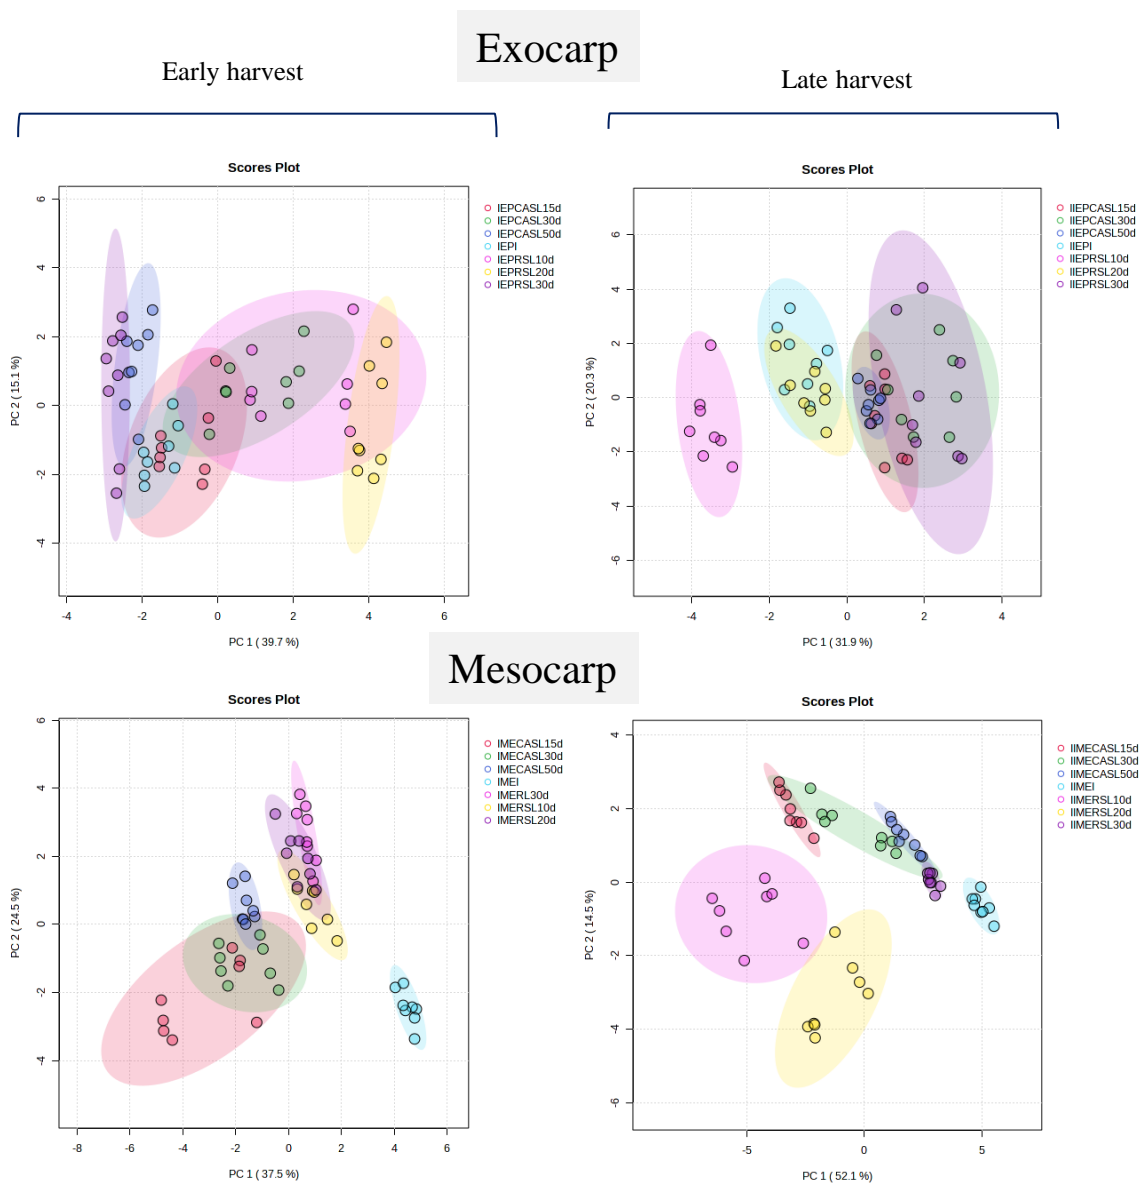

**Figure S2.** Biplot displaying the samples and variables overlaid for the whole dataset: early and middle harvest fruit, at harvest and ready to eat. IMEI and IIMEI = initial samples at early (I) and late (II) harvests. R10d, R20d and R30d = avocados cold stored for 10, 20 and 30 d RSL10d, RSL20d and RSL30d = ready to eat avocados from cold storage at 10, 20 and 30 d. CA15d, CA30d and CA50d = avocados stored for 15, 30 and 50 d under controlled atmosphere. CASL15d, CASL30d and CASL30d = avocados at the ready to eat stage from CA storage for 10, 20 and 30 d.
